# Supplementary material for: The Relationship between Short- and Long-Term Memory Is Preserved across the Age Range
Source: MDPI journal article supplement (doi:10.3390/brainsci13010106), 2023-01-05
Supplement: s1 [file s1]

## Supplementary Information

**Table S1.** Supplementary statistics for Experiment 1, including main effects (a) and post-hoc comparisons (b).

| a. Main effects                        |                            |          |          |
|----------------------------------------|----------------------------|----------|----------|
| Identification accuracy                |                            |          |          |
| Effect                                 | Statistic                  |          | <i>p</i> |
| Age group × Set size                   | $ATS(1.90, \infty) = 1.04$ |          | 0.35     |
| Age group × Memory duration            | $ATS(1.99, \infty) = 0.05$ |          | 0.95     |
| Age group × Set size × Memory duration | $ATS(1.89, \infty) = 1.43$ |          | 0.24     |
| Identification response time           |                            |          |          |
| Effect                                 | Statistic                  |          | <i>p</i> |
| Age group × Set size                   | $ATS(2.00, \infty) = 0.44$ |          | 0.64     |
| Age group × Memory duration            | $ATS(1.93, \infty) = 0.80$ |          | 0.44     |
| Age group × Set size × Memory duration | $ATS(1.86, \infty) = 0.71$ |          | 0.48     |
| Localisation error                     |                            |          |          |
| Effect                                 | Statistic                  |          | <i>p</i> |
| Age group × Set size                   | $ATS(1.96, \infty) = 1.02$ |          | 0.36     |
| Age group × Memory duration            | $ATS(1.96, \infty) = 1.93$ |          | 0.14     |
| Age group × Set size × Memory duration | $ATS(1.98, \infty) = 2.02$ |          | 0.13     |
| b. Post-hoc comparisons                |                            |          |          |
| Identification accuracy                |                            |          |          |
| Effect                                 | Statistic                  | <i>z</i> | <i>p</i> |
| Young vs Older                         | $U = 7500.5$               | 3.69     | <0.001   |
| Middle-aged vs Older                   | $U = 7208.5$               | 2.66     | 0.008    |
| Young vs Middle-aged                   | $U = 6711.0$               | 0.96     | 0.34     |
| STM: 1-object vs 3 objects             | $ATS(1, \infty) = 33.76$   | n/a      | 0.001    |
| LTM: 1-object vs 3 objects             | $ATS(1, \infty) = 0.01$    | n/a      | 0.91     |
| Identification response time           |                            |          |          |
| Effect                                 | Statistic                  | <i>z</i> | <i>p</i> |
| Young vs Older                         | $U = 5265.00$              | -4.01    | <0.001   |
| Middle-aged vs Older                   | $U = 5576.00$              | -2.95    | 0.003    |
| Young vs Middle-aged                   | $U = 6201.00$              | -0.82    | 0.42     |
| STM: 1-object vs 3 objects             | $ATS(1, \infty) = 141.64$  | n/a      | 0.001    |
| LTM: 1-object vs 3 objects             | $ATS(1, \infty) = 1.70$    | n/a      | 0.19     |
| Localisation error                     |                            |          |          |

| Effect                     | Statistic                 |       | <i>p</i> |
|----------------------------|---------------------------|-------|----------|
| Young vs Older             | $U = 5434.0$              | -3.43 | < 0.001  |
| Middle-aged vs Older       | $U = 5557.0$              | -3.01 | 0.003    |
| Young vs Middle-aged       | $U = 6303.0$              | -0.47 | 0.64     |
| STM: 1-object vs 3 objects | $ATS(1, \infty) = 209.26$ | n/a   | 0.001    |
| LTM: 1-object vs 3 objects | $ATS(1, \infty) = 40.40$  | n/a   | 0.001    |
